# Supplementary material for: Intestinal microbiota sustains inflammation and autoimmunity induced by hypomorphic RAG defects
Source: PubMed Central journal article supplement — J Exp Med. 2016 Mar 7;213(3):355–75. doi: 10.1084/jem.20151116 (PMC4813669; doi:10.1084/jem.20151116), 2016-03-07
Supplement: supp_jem.20151116_JEM_20151116_sm.pdf [file supp_jem.20151116_JEM_20151116_sm.pdf]

## SUPPLEMENTAL MATERIAL

Rigoni et al, <http://www.jem.org/cgi/content/full/jem.20151116/DC1>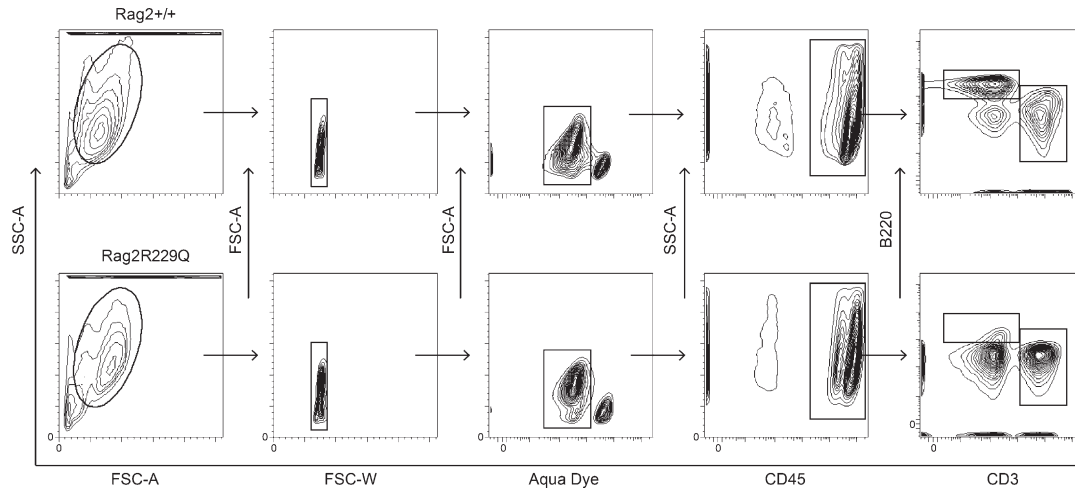

Figure S1. Representative gating strategy to identify CD3<sup>+</sup> T cells and B220<sup>+</sup> B cells in the intestinal LP of *Rag2*<sup>+/+</sup> and *Rag2*<sup>R229Q</sup>. Doublet exclusion (FSC-W vs. FSC-A) and live cell identification were performed (aqua dye vs. FSC-A). Cells were then gated on a CD45<sup>+</sup> population to identify lymphocytes.

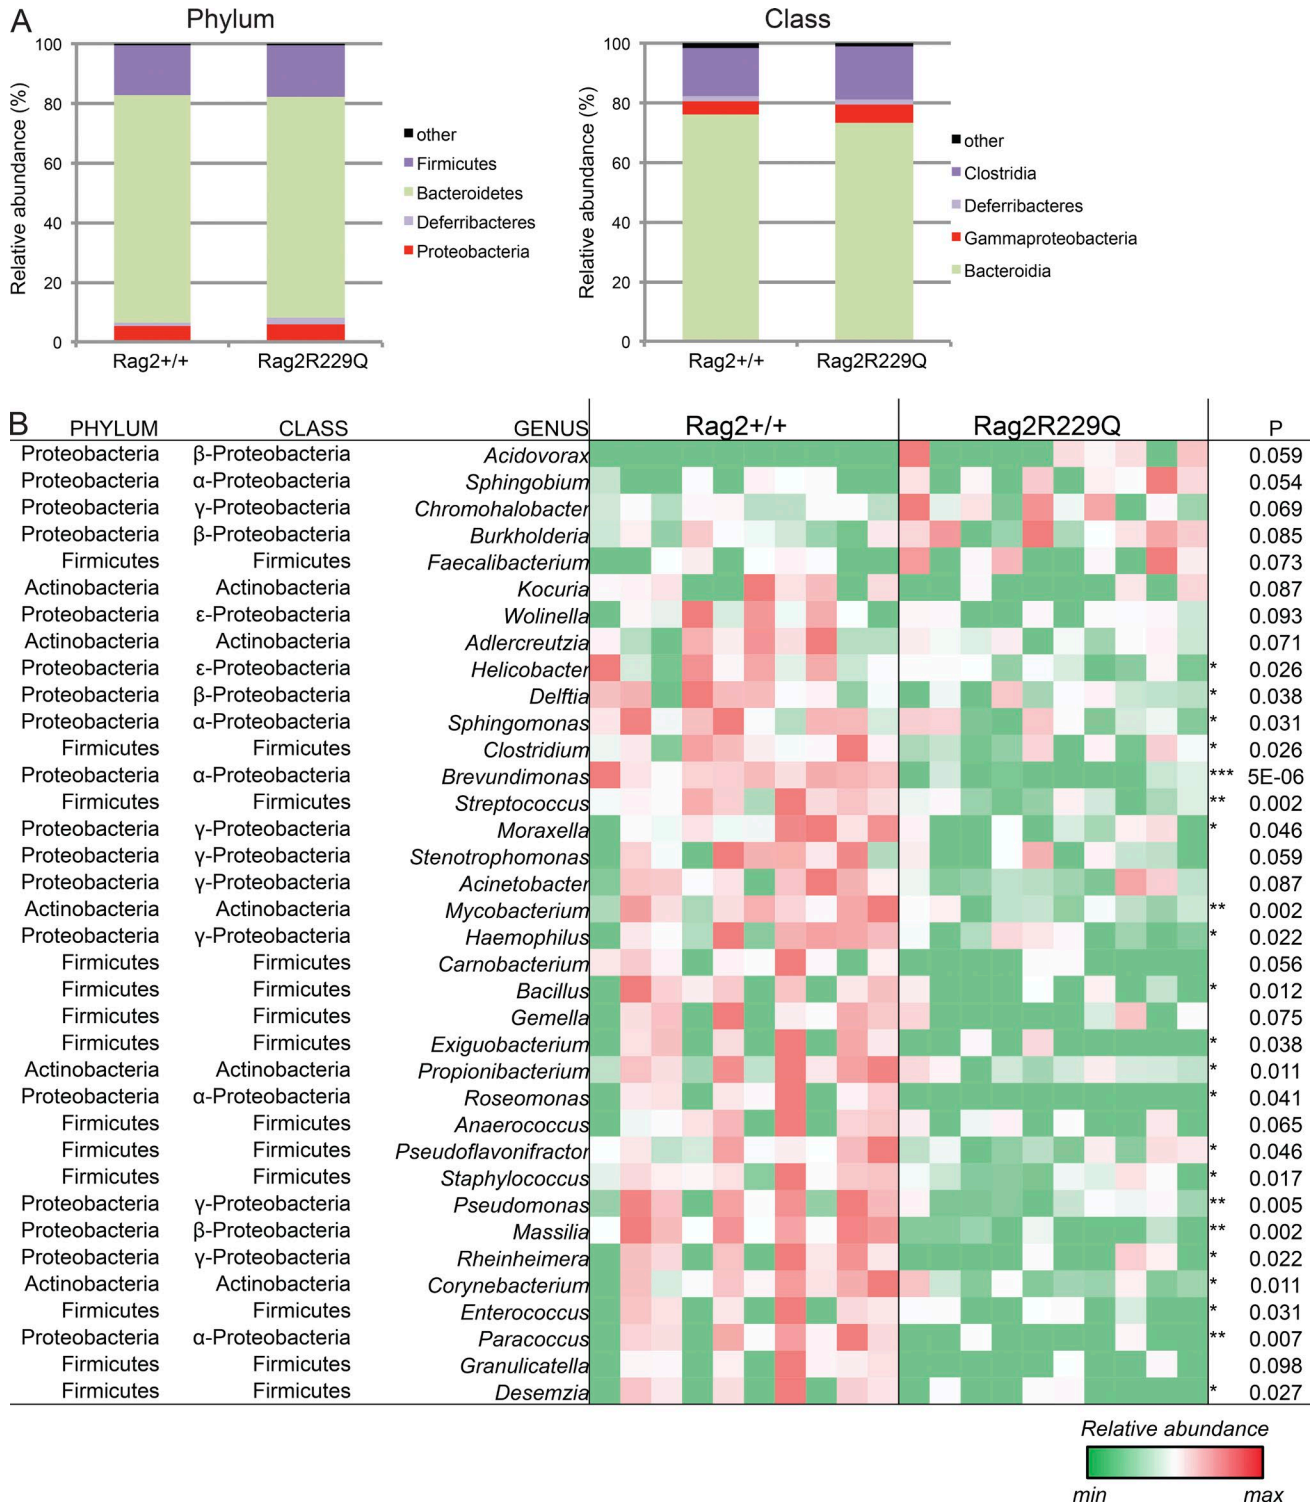

Figure S2. **Analysis of microbiota composition.** (A) Relative abundance of intestinal microbiota at class and phylum level in *Rag2*<sup>+/+</sup> and *Rag2*<sup>R229Q</sup> mice. (B) Heat map of bacterial genera in the gut microbiota that discriminate *Rag2*<sup>R229Q</sup> from *Rag2*<sup>+/+</sup> mice with a cutoff of P < 0.1. Each line represents one genus; each column represents an individual mouse; color represents the difference between *Rag2*<sup>+/+</sup> and *Rag2*<sup>R229Q</sup> littermates, green indicating lower and red higher expression. P-values are according to two-tailed unpaired Student's *t* test. \*, P < 0.05; \*\*, P < 0.01; \*\*\*, P < 0.001.

Table S1. List of primers used in this study

| Gene                      | Sequence or assay number       |
|---------------------------|--------------------------------|
| <b>SYBR green primers</b> |                                |
| Actb for                  | 5'-CTAAGGCCAACCGTAAAAAG-3'     |
| Actb rev                  | 5'-ACCAGAGGCATACAGGGACA-3'     |
| IL-17A for                | 5'-TCCAGAAGGCCCTCAGACTA-3'     |
| IL-17A rev                | 5'-TGAGCTTCCCAGATCACAGA-3'     |
| IFN- $\gamma$ for         | 5'-TCAAGTGGCATAGATGTGGAAGAA-3' |
| IFN- $\gamma$ rev         | 5'-TGGCTCTGCAGGATTTTCATG-3'    |
| IL-22 for                 | 5'-TGACCACCAGAACATCCAGA-3'     |
| IL-22 rev                 | 5'-AATCGCCTTGATCTCTCCAC-3'     |
| IL-10 for                 | 5'-GGTTGCCAAGCCTTATCGGA-3'     |
| IL-10 rev                 | 5'-ACCTGCTCCACTGCCTTGCT-3'     |
| IL-6 for                  | 5'-GTAGCTATGGTACTCCAGAAGAC-3'  |
| IL-6 rev                  | 5'-ACGATGATGCACCTTGAGAA-3'     |
| TNF for                   | 5'-GACGTGGAAGTGGCAGAAGAG-3'    |
| TNF rev                   | 5'-TTGGTGGTTTGTGAGTGTGAG-3'    |
| RegIII $\gamma$ for       | 5'-TTCCTGTCTCCATGATCAAAA-3'    |
| RegIII $\gamma$ rev       | 5'-CATCCACCTCTGTTGGTTCA-3'     |
| IL-1 $\beta$ for          | 5'-GCCCATCCTCTGTGACTCAT-3'     |
| IL-1 $\beta$ rev          | 5'-AGGCCACAGGTATTTTGTGC-3'     |
| CCL2 for                  | 5'-CTGGATCGGAACCAAATGAG-3'     |
| CCL2 rev                  | 5'-AAGGCATCACAGTCCGAGTC-3'     |
| CCL20 for                 | 5'-AACTGGTGAAAAGGGTGT-3'       |
| CCL20 rev                 | 5'-GTCCAATTCCATCCCAAAA-3'      |
| CXCL10 for                | 5'-GCTGCCGTCATTTTCTGC-3'       |
| CXCL10 rev                | 5'-TCTCACTGGCCGTCATC-3'        |
| CXCL9 for                 | 5'-CTTTTCTCTTGGGCATCAT-3'      |
| CXCL9 rev                 | 5'-GCATCGTGCAATTCCTTATCA-3'    |
| CCL5 for                  | 5'-GTGCCACGTC AAGGGTAT-3'      |
| CCL5 rev                  | 5'-CCCACTTCTTCTCTCTGGGTTG-3'   |
| CCL25 for                 | 5'-GAGTGCCACCCCTAGGTCATC-3'    |
| CCL25 rev                 | 5'-CCAGCTGGTGCTTACTCTGA-3'     |
| 16s for                   | 5'-GTGSTGCAYGGYGTCTCGTCA-3'    |
| 16s rev                   | 5'-ACGTCRTCCMCACCTTCTCTC-3'    |
| 18s for                   | 5'-CTCAACACGGGAAACCTCCTCAC-3'  |
| 18s rev                   | 5'-CGTCCACCACTAAGAAGG-3'       |
| IL-4 for                  | 5'-CATCGGCATTTTGAACGAG-3'      |
| IL-4 rev                  | 5'-CGAGCTCACTCTCTGTGGTG-3'     |
| IL-23p19 for              | 5'-AGCCAGTTCTGCTTGCAAAGG-3'    |
| IL-23p19 rev              | 5'-GGAGGTTGTGAAGTTGCTCCATG-3'  |
| TGF- $\beta$ for          | 5'-TGGAGCAACATGTGGAATC-3'      |
| TGF- $\beta$ rev          | 5'-GTCAGCAGCCGTTACCA-3'        |
| IL-12p35 for              | 5'-CTATCTGAGCTCCGCCTGAAAG-3'   |
| IL-12p35 rev              | 5'-GGCCAAGACCACCTGACTCTTA-3'   |
| <b>TaqMan probes</b>      |                                |
| Actb                      | Mm00607939_s1                  |
| Rorc                      | Mm01261022_m1                  |
| Tbx21                     | Mm00450960_m1                  |
